# Supplementary material for: Autophagy triggered by magnolol derivative negatively regulates angiogenesis
Source: PubMed Central journal article supplement — Cell Death Dis. 2013 Oct 31;4(10):e889–. doi: 10.1038/cddis.2013.399 (PMC3920944; doi:10.1038/cddis.2013.399), 2013-10-31
Supplement: cddis2013399x1.pdf [file cddis2013399x1.pdf]

Figure S 1

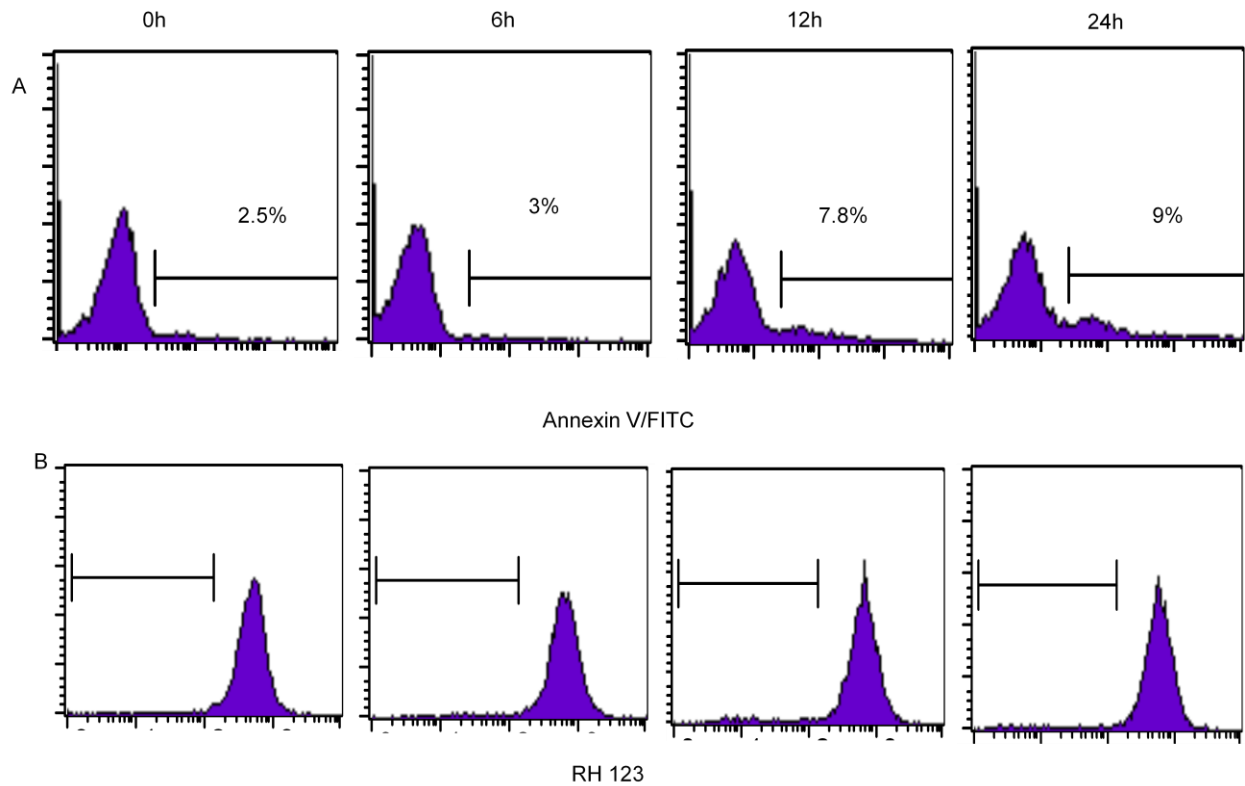

**Figure S1.** Ery5 did not induce apoptosis in PC-3 cells. **(A)** PC-3 cells were treated with 10  $\mu$ M of Ery5 for 6 h, 12 h and 24 h. Annexine/PI staining was done as described in materials and methods. The results showed that Ery5 could not induce significant apoptosis in PC-3 cells. **(B)** Cells were treated with 10  $\mu$ M of Ery5 for 6 h, 12 h and 24 h and stained with RH123 to check any loss in mitochondrial membrane potential. The results indicated that mitochondrial membrane potential remained unaffected by Ery5 treatment.

Figure S2  
A

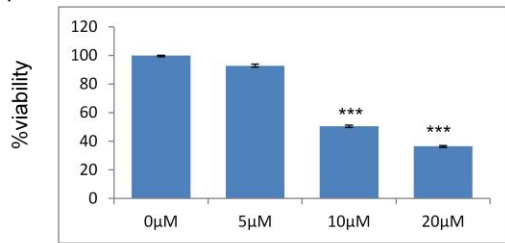

B

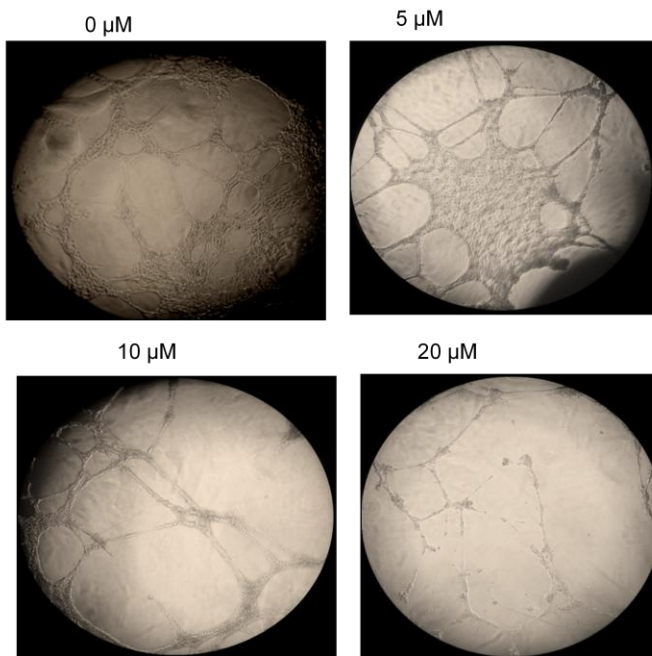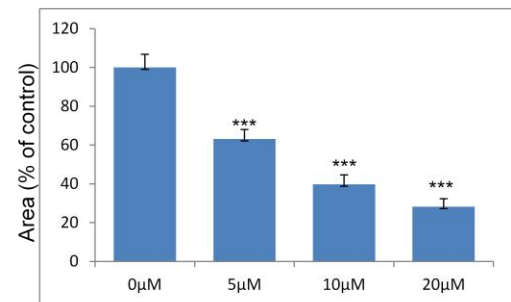

**Figure S2.** The inhibitory effect of Ery5 was better on tube formation than on viability. (A) HUVECs were seeded in 96 well plate and treated with 5 μM, 10 μM and 20 μM of Ery5 for 24 h. MTT dye was added 3 h before the termination of the experiment. Viability was calculated as described in materials and methods. (B) Ery5 significantly inhibited tube formation in HUVECs. Tube formation assay was performed as described in materials and methods. The results indicated that Ery5 inhibited tube formation significantly at 5 μM concentration the inhibition was about 35% at 5 μM which was increased to 61% and 78 % at 10 μM and 20 μM concentrations of Ery5 respectively.
